# Supplementary material for: Exploration of Artificial Intelligence Use with ARIES in Multiple Myeloma Research
Source: PubMed Central journal article supplement (PMC6678083; doi:10.3390/jcm8070999), 2019-07-09
Supplement: jcm-08-00999-s001.pdf [file jcm-08-00999-s001.pdf]

## Supplementary Materials: Exploration of Artificial Intelligence Usage in Multiple Myeloma Research with ARIES

**Table S1.** Attributes Covered by Multiple Myeloma Ontology

| Parent Attribute | First Child<br>Attribute                                                                                                                                                                                                                                                                                                                                                                                                                                                                                                                                | Second Child<br>Attribute                                  | Third Child<br>Attribute |
|------------------|---------------------------------------------------------------------------------------------------------------------------------------------------------------------------------------------------------------------------------------------------------------------------------------------------------------------------------------------------------------------------------------------------------------------------------------------------------------------------------------------------------------------------------------------------------|------------------------------------------------------------|--------------------------|
| CRAB             | Anemia<br>Bone lesion<br>Drop of Hb<br>Hypercalcemia<br>Renal impairment<br>SLIM-CRAB                                                                                                                                                                                                                                                                                                                                                                                                                                                                   |                                                            |                          |
| Cytogenetic      | High risk cytogenetic                                                                                                                                                                                                                                                                                                                                                                                                                                                                                                                                   | del(17/17p)<br>gain(1q)<br>t(14;16)<br>t(14;20)<br>t(4;14) |                          |
| Laboratory       | del(1p)<br>del(13q)<br>t(11;14)<br>Hyperdiploidy<br>Tetrasomy<br>Trisomy<br>Free kappa light chain<br>Free lambda light chain<br>kappa light chain (SU)<br>lambda light chain (SU)<br>Beta 2 microglobulin<br>CRP<br>GFR<br>Hemoglobin<br>Immunoglobulin A<br>Immunoglobulin D<br>Immunoglobulin G<br>Immunoglobulin M<br>Calcium<br>Creatinin<br>LDH<br>Leucocytes<br>Lymphocytes<br>Neutrophiles<br>Thrombocytes<br>Total albumin level<br>serum<br>Total albuminuria level (SU)<br>Total protein level serum<br>Total proteinuria level (SU)<br>Urea |                                                            |                          |
|                  | Type of myeloma                                                                                                                                                                                                                                                                                                                                                                                                                                                                                                                                         | Asecretoric myeloma                                        |                          |

|                         |                                                                                                                                                                                                                                  |                                                                                                                                                                                                                                                                                                                                                                                     |                 |
|-------------------------|----------------------------------------------------------------------------------------------------------------------------------------------------------------------------------------------------------------------------------|-------------------------------------------------------------------------------------------------------------------------------------------------------------------------------------------------------------------------------------------------------------------------------------------------------------------------------------------------------------------------------------|-----------------|
| Myeloma specific        | Biclonal myeloma<br>Extramedullary myeloma<br>Light chain myeloma<br>Multiple myeloma<br>Monoclonal gammopathy of undetermined significance (MGUS)<br>Smoldering multiple myeloma<br>Solitary plasmocytoma                       |                                                                                                                                                                                                                                                                                                                                                                                     |                 |
|                         | Bence Jones proteinuria<br>Bence Jones proteinemia<br>Primary diagnosis<br>Heavy chain type<br>Light chain type<br>Bone marrow infiltration<br>Paraprotein<br>Pathological fracture<br>Serum light chain kappa/lambda ratio      |                                                                                                                                                                                                                                                                                                                                                                                     |                 |
|                         | Gastrointestinal                                                                                                                                                                                                                 | Diarrhea<br>Hepatomegaly<br>Mucositis<br>Soor<br>Splenomegaly<br>Stomatitis                                                                                                                                                                                                                                                                                                         |                 |
|                         | Hematological                                                                                                                                                                                                                    | <table border="1"> <tr> <td>Cellular change</td> <td>           Leucocytopenia<br/>           Depletion of lymphocytes<br/>           Neutropenia<br/>           Pancytopenia<br/>           Thrombocytopenia<br/>           Tricytopenia         </td> </tr> </table> Immune paresis<br>B symptoms<br>Graft versus host<br>Hyperviscosity<br>Paraneoplasia<br>Plasma cell leukemia | Cellular change |
| Cellular change         | Leucocytopenia<br>Depletion of lymphocytes<br>Neutropenia<br>Pancytopenia<br>Thrombocytopenia<br>Tricytopenia                                                                                                                    |                                                                                                                                                                                                                                                                                                                                                                                     |                 |
| Infection, Reactivation | Cytomegalovirus<br>Febrile neutropenia<br>Herpes simplex virus<br>Influenza<br>Mycosis<br>Fungal pneumonie<br>Epstein-Barr virus<br>Hepatitis B virus<br>Respiratory syncytial virus<br>Superinfection<br>Varizalle zoster virus |                                                                                                                                                                                                                                                                                                                                                                                     |                 |

|                                                    |               |                    |                                                                                                                                                                                                                                            |
|----------------------------------------------------|---------------|--------------------|--------------------------------------------------------------------------------------------------------------------------------------------------------------------------------------------------------------------------------------------|
| Adverse Events,<br>Complications,<br>Comorbidities |               | Cardiac arrhythmia | AV block<br>Bradycardia<br>Sick sinus syndrom<br>Tachycardia<br>Atrial fibrillation<br>Atrial flutter                                                                                                                                      |
|                                                    | Kardiological |                    | Cerebrovascular Occlusive Disease<br>Endocarditis<br>Congestive heart failure<br>Valvular insufficiency<br>Hypertensive crisis<br>Myocarditis<br>Pericarditis<br>Syncope<br>Venous thromboembolism<br>Thrombosis                           |
|                                                    | Nephrological |                    | Acute kidney failure<br>Amyloidosis<br>CAST Nephropathia<br>Chronic kidney failure<br>Exacerbation of retention parameters<br>Terminal kidney failure                                                                                      |
|                                                    | Neurological  |                    | Compression of myelon<br>Polyneuropathy<br>Spinal canal stenosis                                                                                                                                                                           |
|                                                    |               |                    | Admission on Intensive care unit<br>Death on Intensive care unit<br>Vertebral compression fracture<br>Exanthema<br>Fatigue<br>Fever<br>Cachexia<br>Osteonecrosis of the jaw<br>Adrenal insufficiency<br>Pneumonia<br>Sepsis<br>Side effect |
| Patient                                            |               |                    | Age primary diagnosis<br>ECOG<br>Date of birth<br>ICD 10<br>Karnofsky                                                                                                                                                                      |
| Response<br>criteria                               |               |                    | CR<br>MR<br>NC<br>nCR<br>PD<br>PR                                                                                                                                                                                                          |

|              |                                                                                                                                                                                                                                                                                                              |                                                                                                                                                           |
|--------------|--------------------------------------------------------------------------------------------------------------------------------------------------------------------------------------------------------------------------------------------------------------------------------------------------------------|-----------------------------------------------------------------------------------------------------------------------------------------------------------|
|              | sCR<br>Stable disease<br>VGPR                                                                                                                                                                                                                                                                                |                                                                                                                                                           |
| Risk factors | Metabolic risk factors                                                                                                                                                                                                                                                                                       | Hypercholesterolemia<br>Hypertriglycerinemia<br>Dyslipoproteinemia<br>Hyperlipoproteinemia<br>Hypolipoproteinemia<br>Diabetes mellitus<br>Homocysteinemia |
|              | Obesity<br>Smoker<br>Arterial hypertension<br>Coronary heart disease                                                                                                                                                                                                                                         |                                                                                                                                                           |
| Staging      | ISS<br>revised ISS<br>Salmon and Durie                                                                                                                                                                                                                                                                       |                                                                                                                                                           |
| Therapy      | Bisphosphonate therapy<br>Allogeneic stem cell transplantation<br>Autologous stem cell transplantation<br>Stem cell apheresis<br>Stem cell mobilisation<br>Start of therapy<br>Dose reduction<br>End of therapy<br>HD melphalan<br>Progression<br>Protocol<br>Radiation<br>Refractory<br>Relapse<br>Response |                                                                                                                                                           |
| Substances   | Adriamycin<br>Bendamustin<br>Bortezomib<br>Carfilzomib<br>Carmustin<br>Cisplatin<br>Cyclophosphamid<br>Cytarabin<br>Daratumumab<br>Denosumab<br>Dexamethason<br>Doxorubicin<br>Elotuzumab<br>Etoposid<br>Ixazomib<br>Lenalidomid                                                                             |                                                                                                                                                           |

Panobinostat  
Pomalidomid  
Prednisolon  
Rituximab  
Thalidomid  
Vincristin

---
